# Supplementary material for: Identifying Tumorigenesis and Prognosis‐Related Genes of Lung Adenocarcinoma: Based on Weighted Gene Coexpression Network Analysis
Source: Hindawi journal article supplement (doi:10.1155/2020/4169691), 2020-01-01
Supplement: f1 [file 4169691.f1.pdf]

Supplementary file 1

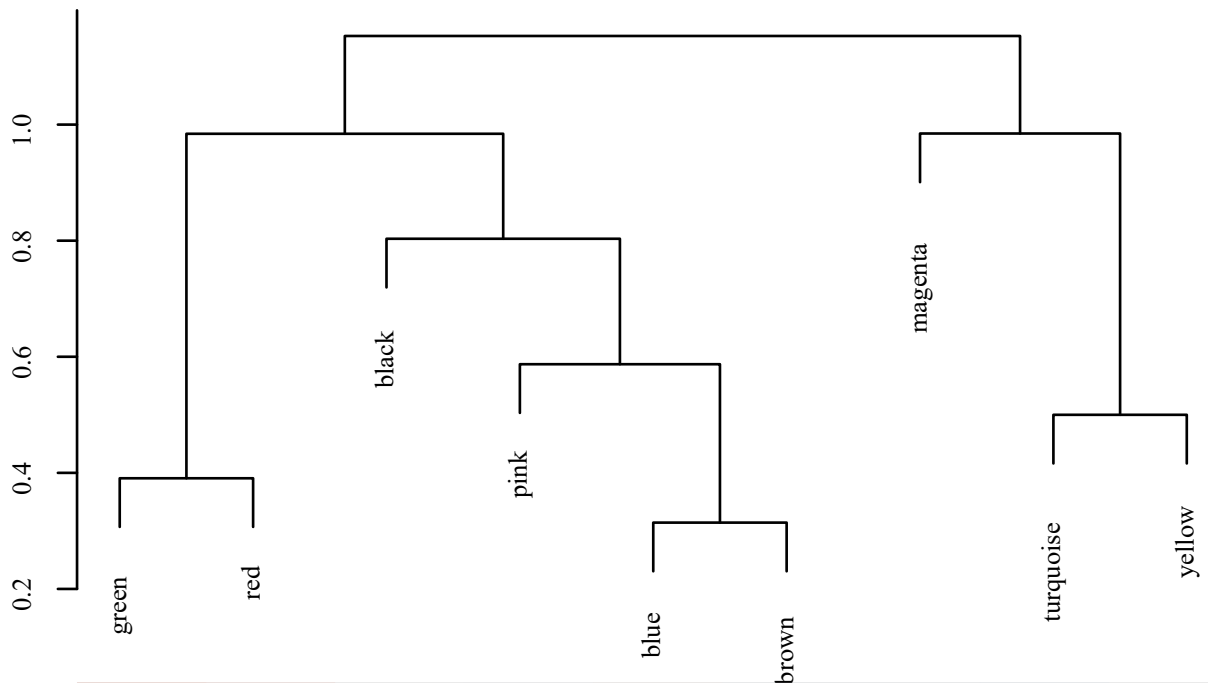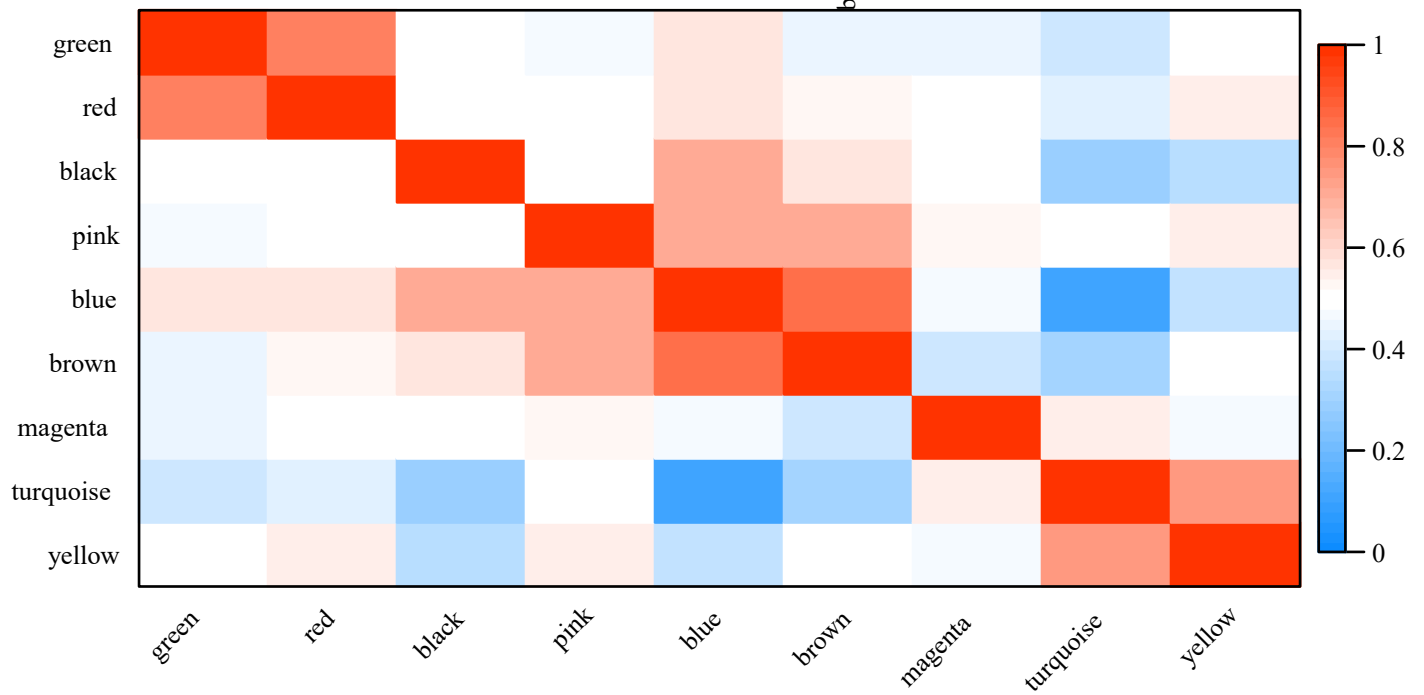

# Supplementary file 2

Module membership vs. gene significance  
cor=0.24, p=0.00053

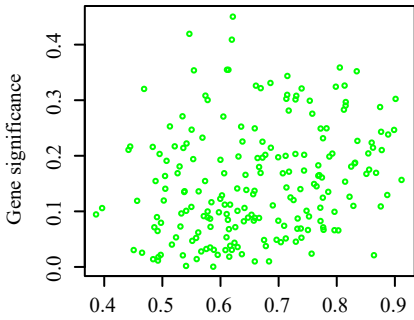

Module Membership in green module

Module membership vs. gene significance  
cor=0.24, p=0.0092

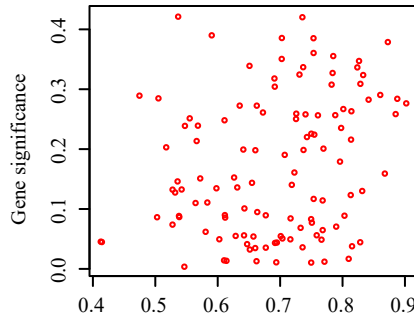

Module Membership in red module

Module membership vs. gene significance  
cor=-0.055, p=0.63

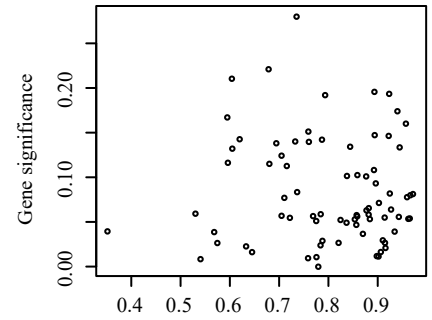

Module Membership in black module

Module membership vs. gene significance  
cor=-0.22, p=0.055

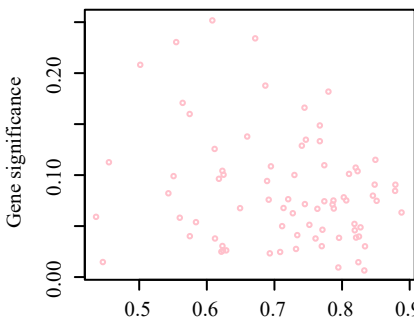

Module Membership in pink module

Module membership vs. gene significance  
cor=-0.19, p=3e-16

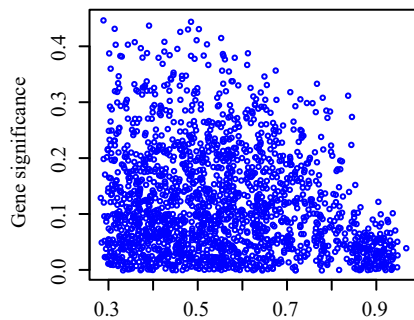

Module Membership in blue module

Module membership vs. gene significance  
cor=0.37, p=6.1e-25

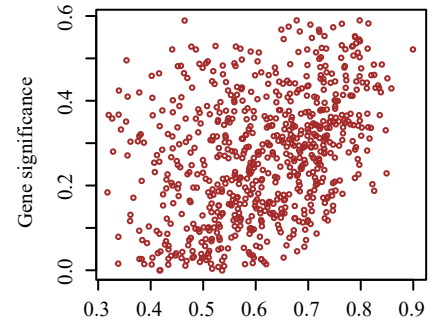

Module Membership in brown module

Module membership vs. gene significance  
cor=0.22, p=0.12

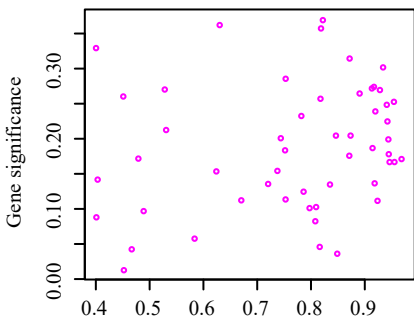

Module Membership in magenta module

Module membership vs. gene significance  
cor=-0.17, p=1e-18

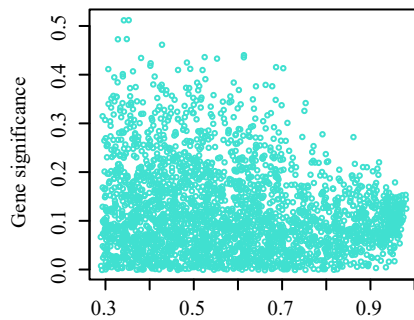

Module Membership in turquoise module

Module membership vs. gene significance  
cor=-0.25, p=1.3e-05

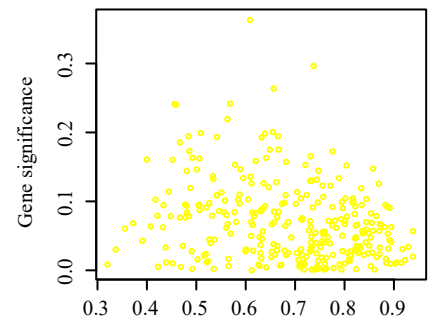

Module Membership in yellow module

Supplementary file 3:

The web links of images from the Human Protein Atlas database in the paper:

ANLN in normal tissues: <https://www.proteinatlas.org/ENSG00000011426-ANLN/tissue/lung#img>;

ANLN in tumors: <https://www.proteinatlas.org/ENSG00000011426-ANLN/pathology/tissue/lung+cancer#img>;

CDCA5 in normal tissues: <https://www.proteinatlas.org/ENSG00000146670-CDCA5/tissue/lung#img>;

CDCA5 in tumors: <https://www.proteinatlas.org/ENSG00000146670-CDCA5/pathology/tissue/lung+cancer#img>;

FLJ21924 (also known as QSER1) in normal tissues: <https://www.proteinatlas.org/ENSG00000060749-QSER1/tissue/lung#img>,

FLJ21924 in tumors: <https://www.proteinatlas.org/ENSG00000060749-QSER1/pathology/tissue/lung+cancer#img>;

LMNB1 in normal tissues: <https://www.proteinatlas.org/ENSG00000113368-LMNB1/tissue/lung#img>;

LMNB1 in tumors: <https://www.proteinatlas.org/ENSG00000113368-LMNB1/pathology/tissue/lung+cancer#img>;

MAD2L1 in normal tissues: <https://www.proteinatlas.org/ENSG00000164109-MAD2L1/tissue/lung#img>;

MAD2L1 in tumors: <https://www.proteinatlas.org/ENSG00000164109-MAD2L1/pathology/tissue/lung+cancer#img>;

RACGAP1 in normal tissues: <https://www.proteinatlas.org/ENSG00000161800-RACGAP1/tissue/lung#img>;

RACGAP1 in tumors: <https://www.proteinatlas.org/ENSG00000161800-RACGAP1/pathology/tissue/lung+cancer#img>;

RFC4 in normal tissues: <https://www.proteinatlas.org/ENSG00000163918-RFC4/tissue/lung#img>;

RFC4 in tumors: <https://www.proteinatlas.org/ENSG00000163918-RFC4/pathology/tissue/lung+cancer#img>;

SNRPD1 in normal tissues: <https://www.proteinatlas.org/ENSG00000167088-SNRPD1/tissue/lung#img>;

SNRPD1 in tumors: <https://www.proteinatlas.org/ENSG00000167088-SNRPD1/pathology/tissue/lung+cancer#img>;

TOP2A in normal tissues: <https://www.proteinatlas.org/ENSG00000131747->

[TOP2A/tissue/lung#img](https://www.proteinatlas.org/ENSG00000131747-TOP2A/tissue/lung#img);

TOP2A in tumors: <https://www.proteinatlas.org/ENSG00000131747-TOP2A/pathology/tissue/lung+cancer#img>;

TTK in normal tissues: <https://www.proteinatlas.org/ENSG00000112742-TTK/tissue/lung#img>;

TTK in tumors: <https://www.proteinatlas.org/ENSG00000112742-TTK/pathology/tissue/lung+cancer#img>;

ZWINT in normal tissues: <https://www.proteinatlas.org/ENSG00000122952-ZWINT/tissue/lung#img>;

ZWINT in tumors: <https://www.proteinatlas.org/ENSG00000122952-ZWINT/pathology/tissue/lung+cancer#img>;
